# Supplementary material for: Exercise Frequency Is Associated With Greater Susceptibility to Sleep Disruption From Bedtime Smartphone Use: A Multi-University Cross-Sectional Study
Source: Research Square preprint supplement (doi:10.21203/rs.3.rs-7752679/v1), 2025-10-22
Supplement: Supplementary file 1 [file 21c18e7827aabaf0827783d6.xlsx]

## Sheet: Table2_T_all_models__publicatio
Title: a. Associations with Sleep Quality (PSQI)
Caption：This table presents the results of ordinary least squares (OLS) regression models estimating associations between PSQI scores and multiple predictors, including bedtime phone use, chronotype (morningness), weekly exercise dose (MET-min/week), academic stress, degree type, family economic status, gender, grade year, interpersonal relationships, major category, and daily study time. Two mod…
Model	Term	Level	Reference	Estimate (95% CI)	p (raw)	p_FDR	Sig
PSQI (main: MET) [OLS]	Bedtime phone use (Z)			0.027 (-0.002, 0.056)	0.0716	0.219
PSQI (main: MET) [OLS]	Morningness (Z)			-0.138 (-0.168, -0.109)	3.77e-20	1.47e-18	***
PSQI (main: MET) [OLS]	Weekly exercise dose (Z, MET-min/week)			-0.019 (-0.049, 0.010)	0.2	0.443
PSQI (main: MET) [OLS]	AcademicStress	Very high	ref=Slight	0.014 (-0.142, 0.170)	0.86	0.958
PSQI (main: MET) [OLS]	AcademicStress	Moderate	ref=Slight	0.019 (-0.134, 0.173)	0.806	0.94
PSQI (main: MET) [OLS]	AcademicStress	High	ref=Slight	0.186 (0.029, 0.343)	0.0205	0.1	*
PSQI (main: MET) [OLS]	AcademicStress	None	ref=Slight	0.392 (0.210, 0.574)	2.45e-05	0.000239	***
PSQI (main: MET) [OLS]	Degree	Master	ref=Undergraduate	0.062 (-0.045, 0.170)	0.255	0.505
PSQI (main: MET) [OLS]	Degree	Doctoral	ref=Undergraduate	0.144 (-0.258, 0.546)	0.484	0.699
PSQI (main: MET) [OLS]	Degree	Combined Bachelor–Master	ref=Undergraduate	-0.059 (-0.568, 0.449)	0.819	0.94
PSQI (main: MET) [OLS]	Degree	Combined Bachelor–Doctoral	ref=Undergraduate	-0.206 (-0.405, -0.007)	0.0424	0.165	*
PSQI (main: MET) [OLS]	FamilyEconomic	Well-off	ref=Affluent	-0.271 (-0.568, 0.025)	0.0731	0.219
PSQI (main: MET) [OLS]	FamilyEconomic	Average	ref=Affluent	-0.153 (-0.448, 0.143)	0.311	0.566
PSQI (main: MET) [OLS]	FamilyEconomic	Some difficulty	ref=Affluent	-0.036 (-0.339, 0.267)	0.817	0.94
PSQI (main: MET) [OLS]	FamilyEconomic	Difficult	ref=Affluent	0.004 (-0.326, 0.333)	0.983	0.988
PSQI (main: MET) [OLS]	Gender	Female	ref=Male	0.035 (-0.026, 0.095)	0.259	0.505
PSQI (main: MET) [OLS]	GradeYear	Level 2	ref=Level 1	0.098 (-0.120, 0.316)	0.377	0.566
PSQI (main: MET) [OLS]	GradeYear	Level 3	ref=Level 1	0.172 (-0.042, 0.385)	0.115	0.321
PSQI (main: MET) [OLS]	GradeYear	Level 4	ref=Level 1	0.137 (-0.075, 0.350)	0.205	0.443
PSQI (main: MET) [OLS]	GradeYear	Level 5	ref=Level 1	0.096 (-0.114, 0.306)	0.371	0.566
PSQI (main: MET) [OLS]	GradeYear	Level 6	ref=Level 1	0.244 (-0.248, 0.736)	0.331	0.566
PSQI (main: MET) [OLS]	Interpersonal	Good	ref=Very good	0.189 (0.086, 0.292)	0.000317	0.00247	**
PSQI (main: MET) [OLS]	Interpersonal	Average	ref=Very good	0.372 (0.264, 0.481)	1.86e-11	3.62e-10	***
PSQI (main: MET) [OLS]	Interpersonal	Poor	ref=Very good	0.619 (0.405, 0.833)	1.43e-08	1.86e-07	***
PSQI (main: MET) [OLS]	Interpersonal	Very poor	ref=Very good	0.619 (0.153, 1.085)	0.00925	0.0515	**
PSQI (main: MET) [OLS]	MajorCat	Humanities	ref=Science & Engineering	0.044 (-0.053, 0.142)	0.374	0.566
PSQI (main: MET) [OLS]	MajorCat	Agriculture	ref=Science & Engineering	0.142 (-0.459, 0.743)	0.643	0.836
PSQI (main: MET) [OLS]	MajorCat	Political & Law	ref=Science & Engineering	0.013 (-0.206, 0.231)	0.91	0.959
PSQI (main: MET) [OLS]	MajorCat	Arts	ref=Science & Engineering	0.044 (-0.273, 0.361)	0.785	0.94
PSQI (main: MET) [OLS]	MajorCat	Medicine	ref=Science & Engineering	-0.001 (-0.073, 0.072)	0.988	0.988
PSQI (main: MET) [OLS]	StudyTime	2–4 hours	ref=≤2 hours	-0.013 (-0.197, 0.171)	0.889	0.959
PSQI (main: MET) [OLS]	StudyTime	4–8 hours	ref=≤2 hours	-0.118 (-0.279, 0.044)	0.153	0.397
PSQI (main: MET) [OLS]	StudyTime	8–12 hours	ref=≤2 hours	-0.174 (-0.338, -0.010)	0.0371	0.161	*
PSQI (main: MET) [OLS]	StudyTime	≥12 hours	ref=≤2 hours	-0.156 (-0.317, 0.005)	0.0572	0.203
PSQI (main: MET) [OLS]	Phone (Z) × Morningness (Z)			-0.007 (-0.034, 0.020)	0.614	0.826
PSQI (main: MET) [OLS]	Phone (Z) × Exercise Dose (Z)			0.043 (0.016, 0.069)	0.00171	0.0111	*
PSQI (main: MET) [OLS]	Morningness (Z) × Exercise Dose (Z)			0.018 (-0.009, 0.046)	0.191	0.443
PSQI (main: MET) [OLS]	Phone × Morningness × Dose (all Z)			0.006 (-0.013, 0.025)	0.532	0.741
PSQI (main: MET) [OLS]	Intercept (baseline)			-0.189 (-0.585, 0.206)	0.349	0.566
PSQI (sensitivity: zsum)	Bedtime phone use (Z)			0.024 (-0.005, 0.054)	0.109	0.273
PSQI (sensitivity: zsum)	Morningness (Z)			-0.133 (-0.163, -0.104)	1.66e-18	6.46e-17	***
PSQI (sensitivity: zsum)	Weekly exercise dose (Z-sum)			-0.016 (-0.046, 0.015)	0.322	0.523
PSQI (sensitivity: zsum)	AcademicStress	Very high	ref=Slight	0.019 (-0.136, 0.175)	0.809	0.936
PSQI (sensitivity: zsum)	AcademicStress	Moderate	ref=Slight	0.025 (-0.129, 0.178)	0.754	0.936
PSQI (sensitivity: zsum)	AcademicStress	High	ref=Slight	0.190 (0.033, 0.347)	0.0177	0.0862	*
PSQI (sensitivity: zsum)	AcademicStress	None	ref=Slight	0.395 (0.213, 0.577)	2.11e-05	0.000206	***
PSQI (sensitivity: zsum)	Degree	Master	ref=Undergraduate	0.056 (-0.052, 0.164)	0.312	0.523
PSQI (sensitivity: zsum)	Degree	Doctoral	ref=Undergraduate	0.139 (-0.263, 0.541)	0.497	0.693
PSQI (sensitivity: zsum)	Degree	Combined Bachelor–Master	ref=Undergraduate	-0.052 (-0.561, 0.456)	0.84	0.936
PSQI (sensitivity: zsum)	Degree	Combined Bachelor–Doctoral	ref=Undergraduate	-0.203 (-0.402, -0.004)	0.0454	0.177	*
PSQI (sensitivity: zsum)	FamilyEconomic	Well-off	ref=Affluent	-0.270 (-0.566, 0.026)	0.0737	0.221
PSQI (sensitivity: zsum)	FamilyEconomic	Average	ref=Affluent	-0.153 (-0.447, 0.142)	0.31	0.523
PSQI (sensitivity: zsum)	FamilyEconomic	Some difficulty	ref=Affluent	-0.034 (-0.337, 0.268)	0.824	0.936
PSQI (sensitivity: zsum)	FamilyEconomic	Difficult	ref=Affluent	0.010 (-0.319, 0.340)	0.95	0.976
PSQI (sensitivity: zsum)	Gender	Female	ref=Male	0.034 (-0.026, 0.094)	0.271	0.523
PSQI (sensitivity: zsum)	GradeYear	Level 2	ref=Level 1	0.101 (-0.117, 0.319)	0.363	0.541
PSQI (sensitivity: zsum)	GradeYear	Level 3	ref=Level 1	0.173 (-0.040, 0.386)	0.112	0.273
PSQI (sensitivity: zsum)	GradeYear	Level 4	ref=Level 1	0.143 (-0.069, 0.355)	0.185	0.401
PSQI (sensitivity: zsum)	GradeYear	Level 5	ref=Level 1	0.102 (-0.109, 0.312)	0.343	0.535
PSQI (sensitivity: zsum)	GradeYear	Level 6	ref=Level 1	0.261 (-0.231, 0.753)	0.299	0.523
PSQI (sensitivity: zsum)	Interpersonal	Good	ref=Very good	0.194 (0.091, 0.297)	0.000226	0.00176	**
PSQI (sensitivity: zsum)	Interpersonal	Average	ref=Very good	0.375 (0.267, 0.484)	1.32e-11	2.57e-10	***
PSQI (sensitivity: zsum)	Interpersonal	Poor	ref=Very good	0.621 (0.407, 0.835)	1.33e-08	1.72e-07	***
PSQI (sensitivity: zsum)	Interpersonal	Very poor	ref=Very good	0.614 (0.148, 1.080)	0.00985	0.0549	**
PSQI (sensitivity: zsum)	MajorCat	Humanities	ref=Science & Engineering	0.044 (-0.053, 0.142)	0.374	0.541
PSQI (sensitivity: zsum)	MajorCat	Agriculture	ref=Science & Engineering	0.121 (-0.480, 0.723)	0.692	0.9
PSQI (sensitivity: zsum)	MajorCat	Political & Law	ref=Science & Engineering	0.019 (-0.200, 0.238)	0.865	0.938
PSQI (sensitivity: zsum)	MajorCat	Arts	ref=Science & Engineering	0.038 (-0.279, 0.355)	0.815	0.936
PSQI (sensitivity: zsum)	MajorCat	Medicine	ref=Science & Engineering	0.000 (-0.072, 0.073)	0.99	0.99
PSQI (sensitivity: zsum)	StudyTime	2–4 hours	ref=≤2 hours	-0.010 (-0.194, 0.173)	0.913	0.962
PSQI (sensitivity: zsum)	StudyTime	4–8 hours	ref=≤2 hours	-0.113 (-0.274, 0.048)	0.169	0.387
PSQI (sensitivity: zsum)	StudyTime	8–12 hours	ref=≤2 hours	-0.173 (-0.336, -0.009)	0.0386	0.167	*
PSQI (sensitivity: zsum)	StudyTime	≥12 hours	ref=≤2 hours	-0.154 (-0.314, 0.007)	0.0611	0.199
PSQI (sensitivity: zsum)	Phone (Z) × Morningness (Z)			-0.008 (-0.036, 0.019)	0.543	0.73
PSQI (sensitivity: zsum)	Phone (Z) × Dose (Z-sum)			0.047 (0.018, 0.076)	0.00145	0.0094	**
PSQI (sensitivity: zsum)	Morningness (Z) × Dose (Z-sum)			0.024 (-0.004, 0.052)	0.0963	0.268
PSQI (sensitivity: zsum)	Phone × Morningness × Dose (Z-sum)			0.022 (-0.001, 0.046)	0.0604	0.199
PSQI (sensitivity: zsum)	Intercept (baseline)			-0.204 (-0.599, 0.190)	0.31	0.523
Title：Associations with Anxiety Symptoms (SAS)
Caption： This table presents the results of ordinary least squares (OLS) regression models estimating associations between SAS scores and multiple predictors, including bedtime phone use, chronotype (morningness), weekly exercise dose (MET-min/week), academic stress, degree type, family economic status, gender, grade year, interpersonal relationships, major category, and daily study time. Two mod…
Model	Term	Level	Reference	Estimate (95% CI)	p (raw)	p_FDR	Sig
SAS (with PSQI, MET) [OLS]	Bedtime phone use (Z)			0.010 (-0.012, 0.031)	0.377	0.656
SAS (with PSQI, MET) [OLS]	Morningness (Z)			-0.212 (-0.234, -0.191)	8.96e-79	1.79e-77	***
SAS (with PSQI, MET) [OLS]	Weekly exercise dose (Z, MET-min/week)			-0.009 (-0.030, 0.013)	0.438	0.674
SAS (with PSQI, MET) [OLS]	Sleep quality (PSQI, Z)			0.534 (0.513, 0.555)	0	0	***
SAS (with PSQI, MET) [OLS]	AcademicStress	Very high	ref=Slight	0.037 (-0.077, 0.152)	0.521	0.719
SAS (with PSQI, MET) [OLS]	AcademicStress	Moderate	ref=Slight	0.040 (-0.072, 0.153)	0.483	0.69
SAS (with PSQI, MET) [OLS]	AcademicStress	High	ref=Slight	0.254 (0.139, 0.369)	1.62e-05	8.11e-05	***
SAS (with PSQI, MET) [OLS]	AcademicStress	None	ref=Slight	0.547 (0.413, 0.681)	1.46e-15	1.46e-14	***
SAS (with PSQI, MET) [OLS]	Degree	Master	ref=Undergraduate	-0.054 (-0.132, 0.025)	0.184	0.45
SAS (with PSQI, MET) [OLS]	Degree	Doctoral	ref=Undergraduate	0.121 (-0.174, 0.416)	0.422	0.674
SAS (with PSQI, MET) [OLS]	Degree	Combined Bachelor–Master	ref=Undergraduate	-0.004 (-0.377, 0.369)	0.985	0.985
SAS (with PSQI, MET) [OLS]	Degree	Combined Bachelor–Doctoral	ref=Undergraduate	-0.096 (-0.242, 0.050)	0.199	0.45
SAS (with PSQI, MET) [OLS]	FamilyEconomic	Well-off	ref=Affluent	-0.015 (-0.232, 0.203)	0.896	0.941
SAS (with PSQI, MET) [OLS]	FamilyEconomic	Average	ref=Affluent	0.041 (-0.175, 0.258)	0.709	0.844
SAS (with PSQI, MET) [OLS]	FamilyEconomic	Some difficulty	ref=Affluent	0.045 (-0.177, 0.267)	0.691	0.844
SAS (with PSQI, MET) [OLS]	FamilyEconomic	Difficult	ref=Affluent	0.132 (-0.110, 0.374)	0.286	0.573
SAS (with PSQI, MET) [OLS]	Gender	Female	ref=Male	0.072 (0.028, 0.116)	0.00143	0.00573	**
SAS (with PSQI, MET) [OLS]	GradeYear	Level 2	ref=Level 1	0.015 (-0.145, 0.175)	0.857	0.926
SAS (with PSQI, MET) [OLS]	GradeYear	Level 3	ref=Level 1	0.016 (-0.141, 0.173)	0.843	0.926
SAS (with PSQI, MET) [OLS]	GradeYear	Level 4	ref=Level 1	0.070 (-0.085, 0.226)	0.376	0.656
SAS (with PSQI, MET) [OLS]	GradeYear	Level 5	ref=Level 1	0.077 (-0.077, 0.231)	0.328	0.625
SAS (with PSQI, MET) [OLS]	GradeYear	Level 6	ref=Level 1	0.299 (-0.062, 0.660)	0.105	0.299
SAS (with PSQI, MET) [OLS]	Interpersonal	Good	ref=Very good	0.144 (0.068, 0.220)	0.000195	0.000865	***
SAS (with PSQI, MET) [OLS]	Interpersonal	Average	ref=Very good	0.367 (0.287, 0.447)	3.1e-19	4.14e-18	***
SAS (with PSQI, MET) [OLS]	Interpersonal	Poor	ref=Very good	0.520 (0.363, 0.677)	1.04e-10	8.31e-10	***
SAS (with PSQI, MET) [OLS]	Interpersonal	Very poor	ref=Very good	0.861 (0.519, 1.203)	8.5e-07	4.85e-06	***
SAS (with PSQI, MET) [OLS]	MajorCat	Humanities	ref=Science & Engineering	0.021 (-0.051, 0.093)	0.568	0.732
SAS (with PSQI, MET) [OLS]	MajorCat	Agriculture	ref=Science & Engineering	-0.023 (-0.464, 0.418)	0.918	0.941
SAS (with PSQI, MET) [OLS]	MajorCat	Political & Law	ref=Science & Engineering	0.065 (-0.095, 0.225)	0.427	0.674
SAS (with PSQI, MET) [OLS]	MajorCat	Arts	ref=Science & Engineering	0.086 (-0.147, 0.319)	0.47	0.69
SAS (with PSQI, MET) [OLS]	MajorCat	Medicine	ref=Science & Engineering	-0.165 (-0.218, -0.111)	1.76e-09	1.18e-08	***
SAS (with PSQI, MET) [OLS]	StudyTime	2–4 hours	ref=≤2 hours	-0.025 (-0.159, 0.110)	0.721	0.844
SAS (with PSQI, MET) [OLS]	StudyTime	4–8 hours	ref=≤2 hours	-0.037 (-0.155, 0.082)	0.544	0.725
SAS (with PSQI, MET) [OLS]	StudyTime	8–12 hours	ref=≤2 hours	-0.076 (-0.196, 0.044)	0.214	0.45
SAS (with PSQI, MET) [OLS]	StudyTime	≥12 hours	ref=≤2 hours	-0.143 (-0.261, -0.025)	0.0173	0.0629	*
SAS (with PSQI, MET) [OLS]	Phone (Z) × Morningness (Z)			-0.016 (-0.036, 0.004)	0.113	0.302
SAS (with PSQI, MET) [OLS]	Phone (Z) × Exercise Dose (Z)			0.003 (-0.016, 0.023)	0.738	0.844
SAS (with PSQI, MET) [OLS]	Morningness (Z) × Exercise Dose (Z)			0.023 (0.003, 0.043)	0.0267	0.0888	*
SAS (with PSQI, MET) [OLS]	Phone × Morningness × Dose (all Z)			0.009 (-0.005, 0.023)	0.211	0.45
SAS (with PSQI, MET) [OLS]	Intercept (baseline)			-0.301 (-0.592, -0.011)	0.0422	0.13	*
SAS (sensitivity: zsum)	Bedtime phone use (Z)			0.009 (-0.013, 0.030)	0.44	0.663
SAS (sensitivity: zsum)	Morningness (Z)			-0.211 (-0.233, -0.189)	5.07e-76	1.01e-74	***
SAS (sensitivity: zsum)	Weekly exercise dose (Z-sum)			-0.006 (-0.028, 0.017)	0.627	0.783
SAS (sensitivity: zsum)	Sleep quality (PSQI, Z)			0.533 (0.512, 0.554)	0	0	***
SAS (sensitivity: zsum)	AcademicStress	Very high	ref=Slight	0.039 (-0.075, 0.153)	0.503	0.694
SAS (sensitivity: zsum)	AcademicStress	Moderate	ref=Slight	0.041 (-0.071, 0.154)	0.473	0.676
SAS (sensitivity: zsum)	AcademicStress	High	ref=Slight	0.255 (0.140, 0.370)	1.49e-05	7.43e-05	***
SAS (sensitivity: zsum)	AcademicStress	None	ref=Slight	0.544 (0.410, 0.678)	1.87e-15	1.87e-14	***
SAS (sensitivity: zsum)	Degree	Master	ref=Undergraduate	-0.056 (-0.136, 0.023)	0.163	0.407
SAS (sensitivity: zsum)	Degree	Doctoral	ref=Undergraduate	0.121 (-0.174, 0.416)	0.421	0.663
SAS (sensitivity: zsum)	Degree	Combined Bachelor–Master	ref=Undergraduate	-0.006 (-0.379, 0.367)	0.974	0.974
SAS (sensitivity: zsum)	Degree	Combined Bachelor–Doctoral	ref=Undergraduate	-0.097 (-0.243, 0.049)	0.194	0.457
SAS (sensitivity: zsum)	FamilyEconomic	Well-off	ref=Affluent	-0.016 (-0.233, 0.201)	0.885	0.93
SAS (sensitivity: zsum)	FamilyEconomic	Average	ref=Affluent	0.040 (-0.176, 0.256)	0.717	0.844
SAS (sensitivity: zsum)	FamilyEconomic	Some difficulty	ref=Affluent	0.044 (-0.178, 0.265)	0.7	0.844
SAS (sensitivity: zsum)	FamilyEconomic	Difficult	ref=Affluent	0.135 (-0.107, 0.377)	0.273	0.52
SAS (sensitivity: zsum)	Gender	Female	ref=Male	0.072 (0.027, 0.116)	0.00154	0.00618	**
SAS (sensitivity: zsum)	GradeYear	Level 2	ref=Level 1	0.015 (-0.145, 0.175)	0.859	0.928
SAS (sensitivity: zsum)	GradeYear	Level 3	ref=Level 1	0.014 (-0.142, 0.171)	0.858	0.928
SAS (sensitivity: zsum)	GradeYear	Level 4	ref=Level 1	0.070 (-0.086, 0.226)	0.379	0.659
SAS (sensitivity: zsum)	GradeYear	Level 5	ref=Level 1	0.076 (-0.079, 0.230)	0.337	0.612
SAS (sensitivity: zsum)	GradeYear	Level 6	ref=Level 1	0.307 (-0.054, 0.668)	0.0952	0.272
SAS (sensitivity: zsum)	Interpersonal	Good	ref=Very good	0.147 (0.071, 0.223)	0.000142	0.000632	***
SAS (sensitivity: zsum)	Interpersonal	Average	ref=Very good	0.370 (0.290, 0.450)	1.71e-19	2.28e-18	***
SAS (sensitivity: zsum)	Interpersonal	Poor	ref=Very good	0.522 (0.365, 0.680)	8.68e-11	6.95e-10	***
SAS (sensitivity: zsum)	Interpersonal	Very poor	ref=Very good	0.850 (0.507, 1.192)	1.17e-06	6.71e-06	***
SAS (sensitivity: zsum)	MajorCat	Humanities	ref=Science & Engineering	0.022 (-0.050, 0.093)	0.55	0.734
SAS (sensitivity: zsum)	MajorCat	Agriculture	ref=Science & Engineering	-0.026 (-0.468, 0.415)	0.907	0.93
SAS (sensitivity: zsum)	MajorCat	Political & Law	ref=Science & Engineering	0.067 (-0.094, 0.227)	0.416	0.663
SAS (sensitivity: zsum)	MajorCat	Arts	ref=Science & Engineering	0.090 (-0.142, 0.323)	0.448	0.663
SAS (sensitivity: zsum)	MajorCat	Medicine	ref=Science & Engineering	-0.165 (-0.218, -0.111)	1.71e-09	1.14e-08	***
SAS (sensitivity: zsum)	StudyTime	2–4 hours	ref=≤2 hours	-0.021 (-0.155, 0.114)	0.764	0.873
SAS (sensitivity: zsum)	StudyTime	4–8 hours	ref=≤2 hours	-0.032 (-0.150, 0.086)	0.597	0.771
SAS (sensitivity: zsum)	StudyTime	8–12 hours	ref=≤2 hours	-0.072 (-0.192, 0.048)	0.24	0.506
SAS (sensitivity: zsum)	StudyTime	≥12 hours	ref=≤2 hours	-0.139 (-0.257, -0.021)	0.021	0.0699	*
SAS (sensitivity: zsum)	Phone (Z) × Morningness (Z)			-0.015 (-0.035, 0.005)	0.144	0.384
SAS (sensitivity: zsum)	Phone (Z) × Dose (Z-sum)			0.012 (-0.009, 0.033)	0.273	0.52
SAS (sensitivity: zsum)	Morningness (Z) × Dose (Z-sum)			0.029 (0.009, 0.050)	0.0052	0.0189	*
SAS (sensitivity: zsum)	Phone × Morningness × Dose (Z-sum)			0.010 (-0.007, 0.028)	0.234	0.506
SAS (sensitivity: zsum)	Intercept (baseline)			-0.307 (-0.596, -0.017)	0.0379	0.117	*
Title：Associations with Depression Symptoms (SDS)
Caption：This table presents the results of ordinary least squares (OLS) regression models estimating associations between SDS scores and multiple predictors, including bedtime phone use, chronotype (morningness), weekly exercise dose (MET-min/week), academic stress, degree type, family economic status, gender, grade year, interpersonal relationships, major category, and daily study time. Two mode…
Model	Term	Level	Reference	Estimate (95% CI)	p (raw)	p_FDR	Sig
SDS (with PSQI, MET) [OLS]	Bedtime phone use (Z)			0.019 (-0.004, 0.042)	0.11	0.232
SDS (with PSQI, MET) [OLS]	Morningness (Z)			-0.249 (-0.273, -0.226)	6.55e-95	1.31e-93	***
SDS (with PSQI, MET) [OLS]	Weekly exercise dose (Z, MET-min/week)			-0.007 (-0.030, 0.017)	0.573	0.716
SDS (with PSQI, MET) [OLS]	Sleep quality (PSQI, Z)			0.424 (0.401, 0.446)	2.05e-265	8.22e-264	***
SDS (with PSQI, MET) [OLS]	AcademicStress	Very high	ref=Slight	0.033 (-0.088, 0.155)	0.591	0.716
SDS (with PSQI, MET) [OLS]	AcademicStress	Moderate	ref=Slight	-0.012 (-0.132, 0.108)	0.841	0.885
SDS (with PSQI, MET) [OLS]	AcademicStress	High	ref=Slight	0.223 (0.100, 0.346)	0.000375	0.00166	**
SDS (with PSQI, MET) [OLS]	AcademicStress	None	ref=Slight	0.488 (0.346, 0.631)	1.98e-11	1.59e-10	***
SDS (with PSQI, MET) [OLS]	Degree	Master	ref=Undergraduate	-0.136 (-0.220, -0.052)	0.00151	0.00603	**
SDS (with PSQI, MET) [OLS]	Degree	Doctoral	ref=Undergraduate	0.028 (-0.286, 0.342)	0.863	0.885
SDS (with PSQI, MET) [OLS]	Degree	Combined Bachelor–Master	ref=Undergraduate	-0.096 (-0.493, 0.301)	0.637	0.749
SDS (with PSQI, MET) [OLS]	Degree	Combined Bachelor–Doctoral	ref=Undergraduate	-0.182 (-0.338, -0.027)	0.0216	0.0664	*
SDS (with PSQI, MET) [OLS]	FamilyEconomic	Well-off	ref=Affluent	0.009 (-0.223, 0.241)	0.94	0.94
SDS (with PSQI, MET) [OLS]	FamilyEconomic	Average	ref=Affluent	0.125 (-0.106, 0.355)	0.289	0.462
SDS (with PSQI, MET) [OLS]	FamilyEconomic	Some difficulty	ref=Affluent	0.145 (-0.091, 0.382)	0.229	0.382
SDS (with PSQI, MET) [OLS]	FamilyEconomic	Difficult	ref=Affluent	0.202 (-0.056, 0.459)	0.125	0.25
SDS (with PSQI, MET) [OLS]	Gender	Female	ref=Male	0.024 (-0.023, 0.071)	0.323	0.497
SDS (with PSQI, MET) [OLS]	GradeYear	Level 2	ref=Level 1	0.035 (-0.135, 0.205)	0.688	0.786
SDS (with PSQI, MET) [OLS]	GradeYear	Level 3	ref=Level 1	0.075 (-0.092, 0.242)	0.377	0.556
SDS (with PSQI, MET) [OLS]	GradeYear	Level 4	ref=Level 1	0.146 (-0.019, 0.312)	0.0834	0.185
SDS (with PSQI, MET) [OLS]	GradeYear	Level 5	ref=Level 1	0.172 (0.008, 0.336)	0.0398	0.114	*
SDS (with PSQI, MET) [OLS]	GradeYear	Level 6	ref=Level 1	0.386 (0.002, 0.770)	0.049	0.131	*
SDS (with PSQI, MET) [OLS]	Interpersonal	Good	ref=Very good	0.173 (0.092, 0.253)	2.71e-05	0.000135	***
SDS (with PSQI, MET) [OLS]	Interpersonal	Average	ref=Very good	0.489 (0.404, 0.574)	3.99e-29	5.32e-28	***
SDS (with PSQI, MET) [OLS]	Interpersonal	Poor	ref=Very good	0.695 (0.527, 0.862)	5.23e-16	5.23e-15	***
SDS (with PSQI, MET) [OLS]	Interpersonal	Very poor	ref=Very good	0.811 (0.447, 1.175)	1.29e-05	7.35e-05	***
SDS (with PSQI, MET) [OLS]	MajorCat	Humanities	ref=Science & Engineering	0.030 (-0.046, 0.106)	0.44	0.607
SDS (with PSQI, MET) [OLS]	MajorCat	Agriculture	ref=Science & Engineering	0.061 (-0.408, 0.531)	0.798	0.862
SDS (with PSQI, MET) [OLS]	MajorCat	Political & Law	ref=Science & Engineering	0.128 (-0.042, 0.299)	0.141	0.268
SDS (with PSQI, MET) [OLS]	MajorCat	Arts	ref=Science & Engineering	0.075 (-0.173, 0.322)	0.554	0.716
SDS (with PSQI, MET) [OLS]	MajorCat	Medicine	ref=Science & Engineering	-0.175 (-0.232, -0.118)	1.9e-09	1.26e-08	***
SDS (with PSQI, MET) [OLS]	StudyTime	2–4 hours	ref=≤2 hours	0.019 (-0.124, 0.163)	0.794	0.862
SDS (with PSQI, MET) [OLS]	StudyTime	4–8 hours	ref=≤2 hours	-0.055 (-0.181, 0.071)	0.389	0.556
SDS (with PSQI, MET) [OLS]	StudyTime	8–12 hours	ref=≤2 hours	-0.117 (-0.245, 0.011)	0.0729	0.182
SDS (with PSQI, MET) [OLS]	StudyTime	≥12 hours	ref=≤2 hours	-0.165 (-0.291, -0.040)	0.00995	0.0338	*
SDS (with PSQI, MET) [OLS]	Phone (Z) × Morningness (Z)			-0.014 (-0.035, 0.007)	0.201	0.35
SDS (with PSQI, MET) [OLS]	Phone (Z) × Exercise Dose (Z)			-0.006 (-0.027, 0.015)	0.581	0.716
SDS (with PSQI, MET) [OLS]	Morningness (Z) × Exercise Dose (Z)			0.019 (-0.002, 0.041)	0.0828	0.185
SDS (with PSQI, MET) [OLS]	Phone × Morningness × Dose (all Z)			0.010 (-0.005, 0.025)	0.174	0.316
SDS (with PSQI, MET) [OLS]	Intercept (baseline)			-0.406 (-0.714, -0.097)	0.0101	0.0338	*
SDS (sensitivity: zsum)	Bedtime phone use (Z)			0.018 (-0.005, 0.041)	0.127	0.267
SDS (sensitivity: zsum)	Morningness (Z)			-0.249 (-0.272, -0.225)	2.52e-92	5.04e-91	***
SDS (sensitivity: zsum)	Weekly exercise dose (Z-sum)			-0.004 (-0.028, 0.020)	0.758	0.876
SDS (sensitivity: zsum)	Sleep quality (PSQI, Z)			0.423 (0.401, 0.446)	1.06e-264	4.25e-263	***
SDS (sensitivity: zsum)	AcademicStress	Very high	ref=Slight	0.035 (-0.087, 0.156)	0.574	0.741
SDS (sensitivity: zsum)	AcademicStress	Moderate	ref=Slight	-0.012 (-0.131, 0.108)	0.85	0.917
SDS (sensitivity: zsum)	AcademicStress	High	ref=Slight	0.224 (0.101, 0.346)	0.000349	0.00155	**
SDS (sensitivity: zsum)	AcademicStress	None	ref=Slight	0.487 (0.344, 0.629)	2.32e-11	1.86e-10	***
SDS (sensitivity: zsum)	Degree	Master	ref=Undergraduate	-0.137 (-0.222, -0.053)	0.00143	0.00573	**
SDS (sensitivity: zsum)	Degree	Doctoral	ref=Undergraduate	0.026 (-0.288, 0.340)	0.871	0.917
SDS (sensitivity: zsum)	Degree	Combined Bachelor–Master	ref=Undergraduate	-0.096 (-0.493, 0.301)	0.634	0.793
SDS (sensitivity: zsum)	Degree	Combined Bachelor–Doctoral	ref=Undergraduate	-0.184 (-0.339, -0.028)	0.0208	0.0639	*
SDS (sensitivity: zsum)	FamilyEconomic	Well-off	ref=Affluent	0.006 (-0.225, 0.237)	0.961	0.961
SDS (sensitivity: zsum)	FamilyEconomic	Average	ref=Affluent	0.122 (-0.108, 0.352)	0.299	0.48
SDS (sensitivity: zsum)	FamilyEconomic	Some difficulty	ref=Affluent	0.142 (-0.094, 0.378)	0.238	0.414
SDS (sensitivity: zsum)	FamilyEconomic	Difficult	ref=Affluent	0.202 (-0.056, 0.459)	0.125	0.267
SDS (sensitivity: zsum)	Gender	Female	ref=Male	0.024 (-0.024, 0.071)	0.328	0.504
SDS (sensitivity: zsum)	GradeYear	Level 2	ref=Level 1	0.034 (-0.136, 0.205)	0.692	0.839
SDS (sensitivity: zsum)	GradeYear	Level 3	ref=Level 1	0.074 (-0.093, 0.241)	0.385	0.57
SDS (sensitivity: zsum)	GradeYear	Level 4	ref=Level 1	0.146 (-0.020, 0.312)	0.0842	0.198
SDS (sensitivity: zsum)	GradeYear	Level 5	ref=Level 1	0.171 (0.007, 0.335)	0.0413	0.118	*
SDS (sensitivity: zsum)	GradeYear	Level 6	ref=Level 1	0.389 (0.005, 0.773)	0.0472	0.126	*
SDS (sensitivity: zsum)	Interpersonal	Good	ref=Very good	0.174 (0.094, 0.255)	2.32e-05	0.000116	***
SDS (sensitivity: zsum)	Interpersonal	Average	ref=Very good	0.491 (0.406, 0.576)	3.09e-29	4.11e-28	***
SDS (sensitivity: zsum)	Interpersonal	Poor	ref=Very good	0.697 (0.530, 0.865)	4.52e-16	4.52e-15	***
SDS (sensitivity: zsum)	Interpersonal	Very poor	ref=Very good	0.800 (0.436, 1.164)	1.7e-05	9.69e-05	***
SDS (sensitivity: zsum)	MajorCat	Humanities	ref=Science & Engineering	0.031 (-0.045, 0.107)	0.427	0.589
SDS (sensitivity: zsum)	MajorCat	Agriculture	ref=Science & Engineering	0.060 (-0.409, 0.530)	0.802	0.891
SDS (sensitivity: zsum)	MajorCat	Political & Law	ref=Science & Engineering	0.130 (-0.041, 0.300)	0.137	0.274
SDS (sensitivity: zsum)	MajorCat	Arts	ref=Science & Engineering	0.080 (-0.167, 0.328)	0.526	0.701
SDS (sensitivity: zsum)	MajorCat	Medicine	ref=Science & Engineering	-0.175 (-0.232, -0.118)	1.84e-09	1.23e-08	***
SDS (sensitivity: zsum)	StudyTime	2–4 hours	ref=≤2 hours	0.022 (-0.122, 0.165)	0.766	0.876
SDS (sensitivity: zsum)	StudyTime	4–8 hours	ref=≤2 hours	-0.052 (-0.178, 0.074)	0.421	0.589
SDS (sensitivity: zsum)	StudyTime	8–12 hours	ref=≤2 hours	-0.114 (-0.241, 0.014)	0.0817	0.198
SDS (sensitivity: zsum)	StudyTime	≥12 hours	ref=≤2 hours	-0.162 (-0.287, -0.036)	0.0115	0.0384	*
SDS (sensitivity: zsum)	Phone (Z) × Morningness (Z)			-0.013 (-0.035, 0.008)	0.216	0.394
SDS (sensitivity: zsum)	Phone (Z) × Dose (Z-sum)			-0.001 (-0.024, 0.022)	0.932	0.955
SDS (sensitivity: zsum)	Morningness (Z) × Dose (Z-sum)			0.016 (-0.006, 0.038)	0.146	0.278
SDS (sensitivity: zsum)	Phone × Morningness × Dose (Z-sum)			0.010 (-0.009, 0.028)	0.3	0.48
SDS (sensitivity: zsum)	Intercept (baseline)			-0.407 (-0.715, -0.099)	0.00968	0.0352	*
