# Supplementary material for: Exercise Frequency Is Associated With Greater Susceptibility to Sleep Disruption From Bedtime Smartphone Use: A Multi-University Cross-Sectional Study
Source: Research Square preprint supplement (doi:10.21203/rs.3.rs-7752679/v1), 2025-10-22
Supplement: Supplementary file 2 [file 6d4a26043692266b509e8983.xlsx]

## Sheet: Table1_T_demographic
Variable	Category	N	%
Gender	Male	1663	35.2
	Female	3067	64.8
MajorCat	Science & Engineering	1015	21.5
	Literature & History	649	13.7
	Agriculture	10	0.2
	Politics & Law	89	1.9
	Arts	37	0.8
	Medicine	2930	61.9
Degree	Undergraduate	4206	88.9
	Master	392	8.3
	PhD	23	0.5
	MD-PhD combined	14	0.3
	Direct-PhD	95	2
School	North Sichuan Medical College	1280	27.1
	University of Electronic Science and Technology	38	0.8
	Sichuan University	645	13.6
	Southwest Jiaotong University	633	13.4
	Chengdu University of TCM	20	0.4
	Southwest Medical University	13	0.3
	Other	593	12.5
	None	1508	31.9
PhoneBeforeBed	<10 min	60	1.3
	~10 min	279	5.9
	~30 min	962	20.3
	0.5–1 h	1417	30
	>1 h	2012	42.5
AcademicStress	None	312	6.6
	Mild	1267	26.8
	Moderate	1796	38
	Severe	1178	24.9
	Very severe	177	3.7
StudyTime	<2 h	164	3.5
	2–4 h	319	6.7
	4–8 h	1427	30.2
	8–12 h	1123	23.7
	>12 h	1697	35.9
Interpersonal	Very good	410	8.7
	Good	2550	53.9
	Average	1653	34.9
	Poor	99	2.1
	Very poor	18	0.4
FamilyEconomic	Affluent	43	0.9
	Well-off	1202	25.4
	Average	2703	57.1
	Difficult	623	13.2
	Very difficult	159	3.4
ExerciseIntensity	Low	2328	49.2
	Moderate	2159	45.6
	High	243	5.1
ExerciseDuration	<30 min	1427	30.2
	30–60 min	1773	37.5
	60–120 min	912	19.3
	>120 min	618	13.1
ExerciseFrequency	None	755	16
	Once	1018	21.5
	Twice	1310	27.7
	≥3 times	1647	34.8
