# Supplementary material for: Exercise Frequency Is Associated With Greater Susceptibility to Sleep Disruption From Bedtime Smartphone Use: A Multi-University Cross-Sectional Study
Source: Research Square preprint supplement (doi:10.21203/rs.3.rs-7752679/v1), 2025-10-22
Supplement: Supplementary file 4 [file dd653120d2cc4031aad3c02d.xlsx]

## Sheet: rev_T_mediation_points
Caption: Table Mediation summary for the pathway from bedtime smartphone use to psychological symptoms via PSQI. Reported are standardized coefficients (β) for the a path (Phone→PSQI), the outcome-specific b paths (PSQI→SAS; PSQI→SDS), and the outcome-specific direct effects c′ (Phone→SAS; Phone→SDS), together with the mediated effect (indirect = a×b), the approximate total effect (c′+a×b), and t…
outcome	a(Phone→PSQI)	b(PSQI→SAS)	c′(Phone→SAS)	indirect(a*b)	approx_total(c′+a*b)	PM=indirect/total	b(PSQI→SDS)	c′(Phone→SDS)
SAS	0.0314278719024244	0.5389194300187066	0.0106210395268485	0.016937090812355483	0.027558130339203984	0.6145950615619561
SDS	0.0314278719024244			0.01352359590121041	0.03384007370537451	0.3996325781956728	0.4303058108165184	0.0203164778041641
