# Supplementary material for: Exercise Frequency Is Associated With Greater Susceptibility to Sleep Disruption From Bedtime Smartphone Use: A Multi-University Cross-Sectional Study
Source: Research Square preprint supplement (doi:10.21203/rs.3.rs-7752679/v1), 2025-10-22
Supplement: Supplementary file 5 [file e45930294255f1f2b4479f44.xlsx]

## Sheet: Sheet1
Caption: Standardized path estimates (β), robust standard errors (SE), Wald z statistics, two-tailed p values, and significance codes from structural equation models (SEMs) specifying bedtime smartphone use as the exposure, PSQI as the mediator, and SAS/SDS as parallel outcomes. The primary specification uses exercise dose (MET-min/week); sensitivity specifications replace dose with EF, ED, EI, a…
Outcome	Predictor	PathTag	Beta_std	SE	z	p	p (fmt)	Sig	Beta (std, fmt)
PSQI (sleep quality)	Phone (z)	a (Phone→PSQI)	0.0314279	0.00731176	2.11326	0.0345781	p=0.035	*	0.031
PSQI (sleep quality)	Phone×Dose	Interaction	0.0478068	0.00664303	3.01323	0.00258479	p=0.003	**	0.048
PSQI (sleep quality)	Morningness×Dose	Interaction	0.0222166	0.00690876	1.40182	0.16097	p=0.161		0.022
PSQI (sleep quality)	Phone×Morningness	Interaction	-0.0077173	0.00675839	-0.516224	0.605698	p=0.606		-0.008
PSQI (sleep quality)	Phone×Morningness×Dose	Interaction	0.00401993	0.0047277	0.237063	0.812608	p=0.813		0.004
PSQI (sleep quality)	Interpersonal	Covariate	0.121845	0.0105571	8.41954	0	p<0.001	***	0.122
PSQI (sleep quality)	AcademicStress	Covariate	0.0949772	0.00734618	6.61031	3.83524e-11	p<0.001	***	0.095
PSQI (sleep quality)	FamilyEconomic	Covariate	0.0759695	0.00951967	5.28436	1.26142e-07	p<0.001	***	0.076
PSQI (sleep quality)	StudyTime	Covariate	-0.0430378	0.00642469	-2.99506	0.00274395	p=0.003	**	-0.043
PSQI (sleep quality)	Gender	Covariate	0.0205904	0.0147695	1.43555	0.151131	p=0.151		0.021
PSQI (sleep quality)	MajorCat	Covariate	-0.0177486	0.003229	-1.22568	0.220318	p=0.220		-0.018
PSQI (sleep quality)	Degree	Covariate	-0.0153594	0.0107003	-1.09254	0.274598	p=0.275		-0.015
PSQI (sleep quality)	GradeYear	Covariate	-0.00849856	0.00625762	-0.585835	0.557986	p=0.558		-0.008
PSQI (sleep quality)	Morningness (z)		-0.143186	0.00727522	-9.67643	0	p<0.001	***	-0.143
PSQI (sleep quality)	Exercise dose (z)		-0.022135	0.00740077	-1.47049	0.141429	p=0.141		-0.022
SAS (anxiety)	PSQI (sleep quality)	b (PSQI→SAS)	0.538919	0.00958251	50.3223	0	p<0.001	***	0.539
SAS (anxiety)	Phone (z)	c′ (Phone→SAS)	0.010621	0.00482099	0.969186	0.332453	p=0.332		0.011
SAS (anxiety)	Morningness×Dose	Interaction	0.0265428	0.00455407	2.27341	0.0230017	p=0.023	*	0.027
SAS (anxiety)	Phone×Morningness	Interaction	-0.0188536	0.00445415	-1.71223	0.0868545	p=0.087		-0.019
SAS (anxiety)	Phone×Morningness×Dose	Interaction	0.0113596	0.00311575	0.909516	0.363078	p=0.363		0.011
SAS (anxiety)	Phone×Dose	Interaction	0.00100203	0.0043822	0.0856671	0.931731	p=0.932		0.001
SAS (anxiety)	Interpersonal	Covariate	0.129261	0.00700945	12.0372	0	p<0.001	***	0.129
SAS (anxiety)	AcademicStress	Covariate	0.126472	0.00486372	11.8961	0	p<0.001	***	0.126
SAS (anxiety)	MajorCat	Covariate	-0.0818075	0.00212837	-7.66912	1.73195e-14	p<0.001	***	-0.082
SAS (anxiety)	StudyTime	Covariate	-0.0515419	0.00423812	-4.8653	1.14282e-06	p<0.001	***	-0.052
SAS (anxiety)	Gender	Covariate	0.0350919	0.00973578	3.32101	0.000896917	p<0.001	***	0.035
SAS (anxiety)	FamilyEconomic	Covariate	0.0305454	0.00629231	2.87625	0.00402427	p=0.004	**	0.031
SAS (anxiety)	GradeYear	Covariate	0.0230095	0.00412415	2.15341	0.0312863	p=0.031	*	0.023
SAS (anxiety)	Degree	Covariate	-0.009435	0.00705278	-0.911077	0.362255	p=0.362		-0.009
SAS (anxiety)	Morningness (z)		-0.221337	0.00484187	-20.1102	0	p<0.001	***	-0.221
SAS (anxiety)	Exercise dose (z)		-0.00895491	0.0048785	-0.807516	0.419369	p=0.419		-0.009
SDS (depression)	PSQI (sleep quality)	b (PSQI→SDS)	0.430306	0.0107294	37.6903	0	p<0.001	***	0.430
SDS (depression)	Phone (z)	c′ (Phone→SDS)	0.0203165	0.005398	1.73902	0.0820313	p=0.082		0.020
SDS (depression)	Morningness×Dose	Interaction	0.0222032	0.00509913	1.78386	0.0744461	p=0.074		0.022
SDS (depression)	Phone×Morningness	Interaction	-0.0154241	0.00498725	-1.31396	0.188861	p=0.189		-0.015
SDS (depression)	Phone×Morningness×Dose	Interaction	0.0138369	0.00348866	1.03921	0.298707	p=0.299		0.014
SDS (depression)	Phone×Dose	Interaction	-0.0100484	0.00490669	-0.805833	0.420339	p=0.420		-0.010
SDS (depression)	Interpersonal	Covariate	0.17496	0.00784838	15.2831	0	p<0.001	***	0.175
SDS (depression)	AcademicStress	Covariate	0.11128	0.00544584	9.81846	0	p<0.001	***	0.111
SDS (depression)	MajorCat	Covariate	-0.0849176	0.00238311	-7.46735	8.19345e-14	p<0.001	***	-0.085
SDS (depression)	StudyTime	Covariate	-0.0616519	0.00474537	-5.45898	4.78867e-08	p<0.001	***	-0.062
SDS (depression)	FamilyEconomic	Covariate	0.0532464	0.00704541	4.70313	2.56197e-06	p<0.001	***	0.053
SDS (depression)	GradeYear	Covariate	0.0463134	0.00461775	4.06578	4.7873e-05	p<0.001	***	0.046
SDS (depression)	Degree	Covariate	-0.0313891	0.00789689	-2.8432	0.00446625	p=0.004	**	-0.031
SDS (depression)	Gender	Covariate	0.0131025	0.010901	1.16314	0.244772	p=0.245		0.013
SDS (depression)	Morningness (z)		-0.257748	0.00542137	-21.9672	0	p<0.001	***	-0.258
SDS (depression)	Exercise dose (z)		-0.00723156	0.00546238	-0.6117	0.540736	p=0.541		-0.007
